# Supplementary material for: Influences of nitrogen base excess on ARGET ATRP of styrene with ascorbic acid acetonide and traces of oxygen and water
Source: Royal Society of Chemistry journal article supplement (doi:10.1039/d2py01373h), 2023-01-01
Supplement: d2py01373h1.pdf [file d2py01373h1.pdf]

## Electronic supplementary information

### Influences of nitrogen base excess on ARGET ATRP of styrene with ascorbic acid acetone and traces of oxygen and water

Niccolò Braidi,\* Francesca Parenti, Giulia Scurani, Francesco Tassinari, Mirko Buffagni, Luisa Bonifaci, Gianfranco Cavalca, Nicolò Pettenuzzo, and Franco Ghelfi

#### Contents

|                                                                                                      |    |
|------------------------------------------------------------------------------------------------------|----|
| Preparation of stock solutions of catalyst and initiator .....                                       | 2  |
| Characterizations .....                                                                              | 3  |
| Fig. S1 – Comparison between the spectra of the catalyst after overnight reaction .....              | 4  |
| Fig. S2 – Copper-catalyzed oxidation of aliphatic amines by molecular oxygen .....                   | 5  |
| Table S1 – ARGET ATRP promoted by tertiary amines in absence of H <sub>2</sub> AAPI.....             | 6  |
| Fig. S3 – MWD of Entry 5, Table 1 .....                                                              | 7  |
| Fig. S4 – Comparison between the MWDs of entries 6 and entry 10 of Table 1 .....                     | 8  |
| Fig. S5 – MWD of entry 12 of Table 1. ....                                                           | 9  |
| Fig. S6 – MWD of entry 13 of Table 1 .....                                                           | 10 |
| Fig. S7 – <sup>1</sup> H-NMR of entry 12 of Table 1. ....                                            | 11 |
| Fig. S8 – <sup>1</sup> H-NMR of Entry 16 of Table 1 .....                                            | 12 |
| Table S2 – Full Factorial Design of TMP-promoted ARGET ATRP of styrene with H <sub>2</sub> AAPI..... | 13 |

## **Preparation of stock solutions of catalyst and initiator**

### **Preparation of CuCl<sub>2</sub>/TPMA solution in EtOH**

In a 10 mL volumetric flask, CuCl<sub>2</sub> (70.2 mg, 0.522 mmol) and TPMA (151.6 mg, 0.522 mmol) were weighted. Absolute EtOH (~9 mL) was added, and the flask sonicated to aid dissolution. More EtOH was added to the solution, up to a total volume of 10 mL.

### **Preparation of ECiB solution in EtOAc**

400 µL of ECiB (410 mg, 2.72 mmol) were added to a 10 mL volumetric flask, employing a 500 µL microsyringe. EtOAc was added, up to a total volume of 10 mL.

## Characterizations

### Gel Permeation Chromatography (GPC) procedure

All samples were analyzed using a conventional GPC system. The molecular weight distributions (MWDs) were determined using a Waters GPC system composed of a Waters Alliance 2695 separation module and a Waters 2414 differential refractometer detector. Empower 2 (Waters) was used as the chromatographic analysis software. The system was calibrated with 20 narrow distribution standards of polystyrene with molecular weights ranging from 1300 Da to 7 000 000 Da. Four GPC Phenogel (Phenomenex) columns (size: 300 × 7.6 mm, particle size: 5 μm, porosity 10<sup>6</sup>, 10<sup>5</sup>, 10<sup>4</sup>, and 10<sup>3</sup> Å) were connected and housed in an oven at 30 °C. Tetrahydrofuran for HPLC was used as a mobile phase (flow rate= 1 mL/min, injection volume= 200 μL, sample concentration =2.5 mg/mL) with toluene as the internal standard. From the MWDs the number and mass average molar masses ( $M_n$  and  $M_w$ , respectively) and subsequently dispersity ( $\bar{D} = M_w/M_n$ ) were obtained.

### Nuclear Magnetic Resonance (NMR) procedure

All NMR spectra were recorded with a Bruker AvanceNeo-600MHz spectrometer (Larmor resonance frequency for <sup>1</sup>H: 600.10 MHz) equipped with Prodigy Platform Unit, a 5 mm cryoprobe BBO 600S3 BB-H&F-D-05 ZXT and TopSpin 4.1 software package. Typical acquisition parameters: 256 transients, spectral width 7.5 kHz, and a delay time of 7.0 s. All the spectra were acquired using CDCl<sub>3</sub> as solvent at 298 K and processed with software MestReNova. Chemical shifts were referred to tetramethylsilane peak (added to CDCl<sub>3</sub> in a concentration of 0.1% v/v) at 0.0 ppm.

**Fig. S1 – Comparison between the spectra of the catalyst after overnight reaction**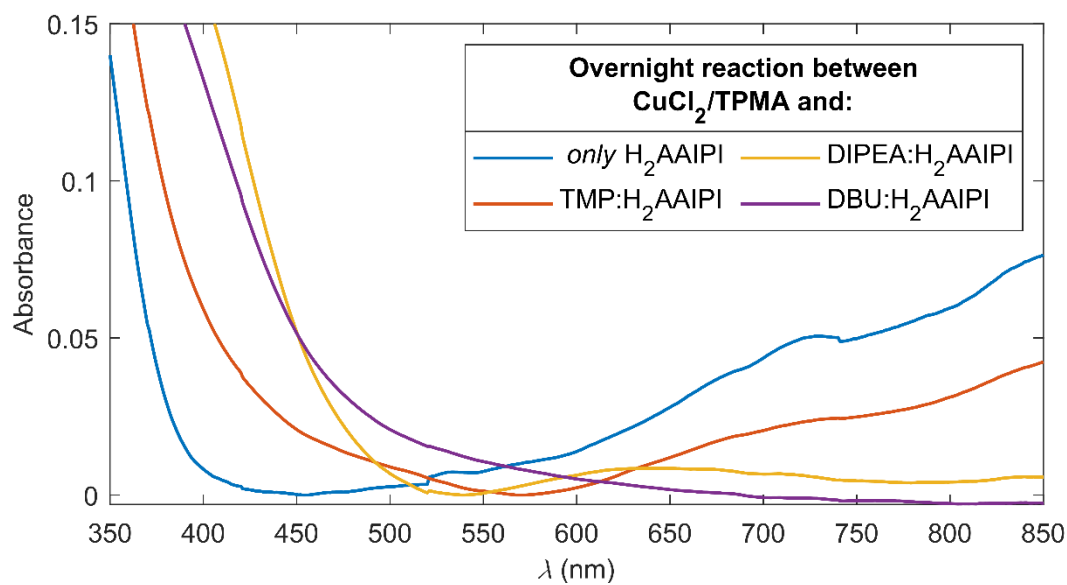

**Fig. S1** – UV/Vis spectra of solution containing:  $[\text{CuCl}_2/\text{TPMA}]_0 : [\text{H}_2\text{AAIPI}]_0 : [\text{base}]_0 = 3.3 : 16.7 : 100$  mol% with respect to the base (50 mmol/L) in  $V_{\text{styrene}} : V_{\text{EtOAc}} : V_{\text{EtOH}} = 1.2 : 0.7 : 0.1$  mL, after overnight reaction at 50 °C under argon.

**Fig. S2 – Copper-catalyzed oxidation of aliphatic amines by molecular oxygen**

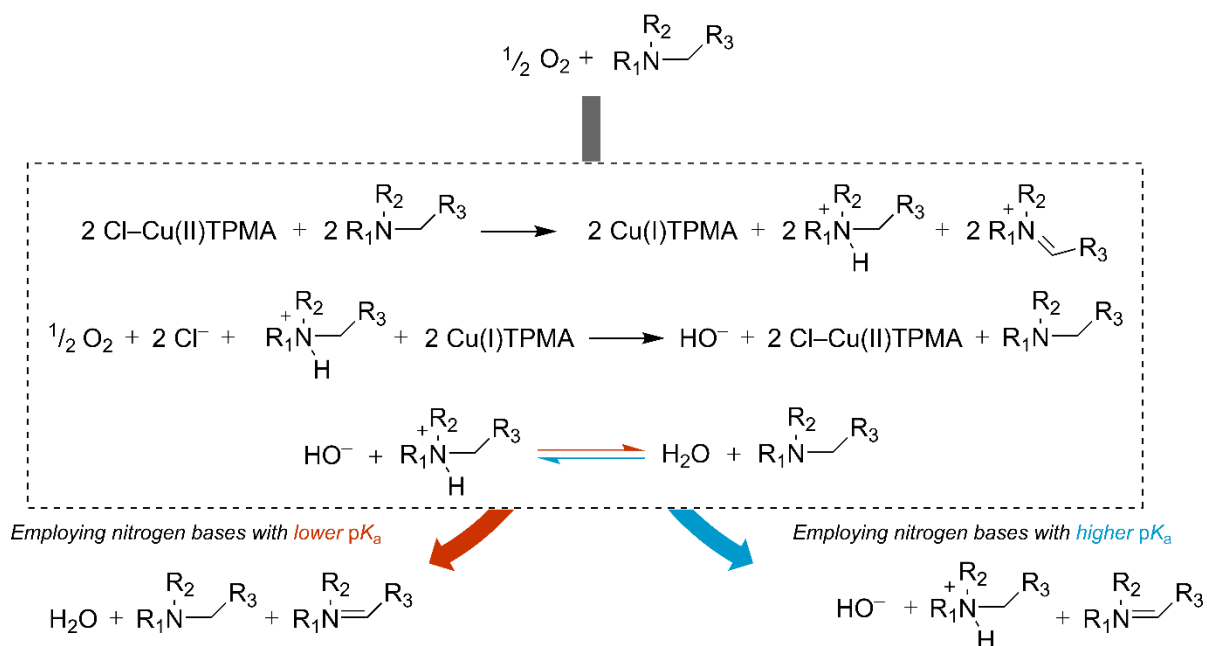

**Fig. S2 – Proposed mechanism for the copper-catalyzed oxidation of tertiary amines by molecular oxygen.**

**Table S1 – ARGET ATRP promoted by tertiary amines in absence of H<sub>2</sub>AAIPI**

**Table S1** – Comparison between nitrogen bases (DBU, DIPEA, and TMP), without the addition of H<sub>2</sub>AAIPI, in the ARGET ATRP of styrene. <sup>A</sup>

| entry | [TPMA] <sub>0</sub><br>(mol%) | [H <sub>2</sub> AAIPI] <sub>0</sub><br>(mol%) | [Base] <sub>0</sub> (mol%) | Time (h) | Conv (%) | M <sub>n</sub> (kDa) | ΔM <sub>n</sub> (%) | D    |
|-------|-------------------------------|-----------------------------------------------|----------------------------|----------|----------|----------------------|---------------------|------|
| 1     | 0.05                          | 0                                             | DBU (0.50)                 | 4.5      | 42       | 27.6                 | + 84                | 2.61 |
| 2     | 0.05                          | 0                                             | DIPEA (0.50)               | 4.5      | 30       | 3.45                 | + 10                | 1.22 |
| 3     | 0.05                          | 0                                             | TMP (0.50)                 | 13.5     | < 1      | –                    | –                   | –    |
| 4     | 0                             | 0                                             | DBU (0.50)                 | 4.5      | 10       | 110.3                | + 99                | 3.00 |

<sup>A</sup> Common reaction conditions: [styrene]<sub>0</sub> : [ECiB]<sub>0</sub> : [CuCl<sub>2</sub>]<sub>0</sub> = 100 : 1.04 : 0.05 mol%, V<sub>styrene</sub> : V<sub>EtOAc</sub> : V<sub>EtOH</sub> = 6 : 3.5 : 0.5 mL, T = 100 °C.

**Fig. S3 – MWD of Entry 5, Table 1**

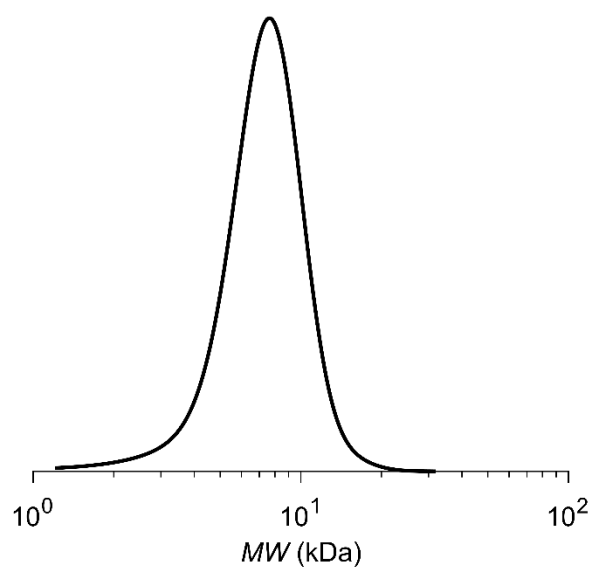

**Fig. S3 – MWD of entry 5 of Table 1.** Conditions:  $V_{St} = 6$  mL,  $V_{EtOAc} = 3.5$  mL,  $V_{EtOH} = 0.5$  mL,  $T = 100$  °C (13.5 h), [styrene]<sub>0</sub>: [ECiB]<sub>0</sub>: [CuCl<sub>2</sub>/TPMA]<sub>0</sub>: [H<sub>2</sub>AAIPi]<sub>0</sub>: [Na<sub>2</sub>CO<sub>3</sub>]<sub>0</sub> = 100:1.04:0.025:0.25:0.25.

Fig. S4 – Comparison between the MWDs of entries 6 and entry 10 of Table 1.

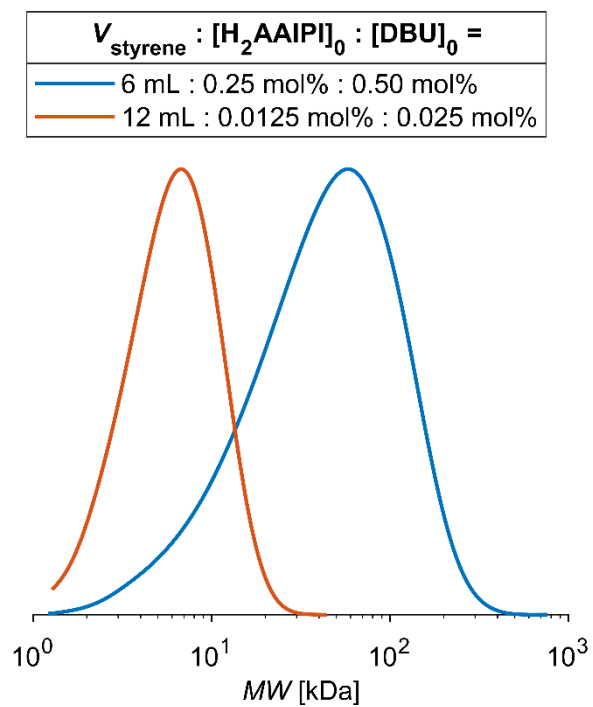

Fig. S4 – MWDs of polystyrene obtained by ARGET ATRP with  $\text{H}_2\text{AAIPI}$  and DBU. *Blue*) entry 6, Table 1. *Orange*) entry 10, Table 1.



**Fig. S5 – MWD of entry 12 of Table 1.**

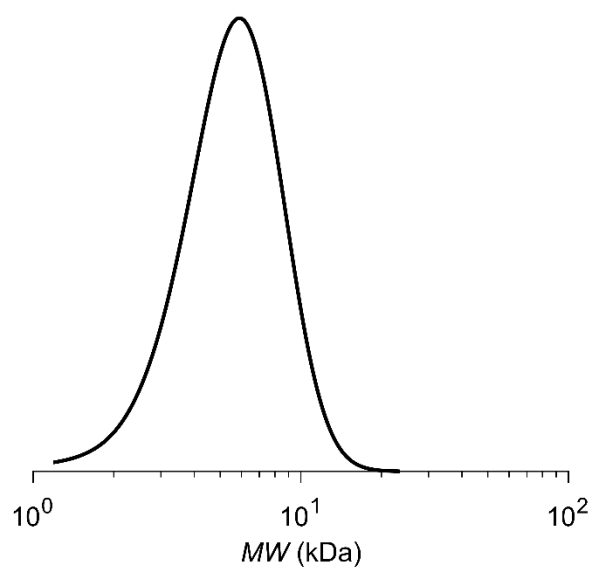

**Fig. S5 – MWD of entry 12 of Table 1.** Conditions:  $V_{\text{styrene}} = 6$  mL,  $V_{\text{EtOAc}} = 3.5$  mL,  $V_{\text{EtOH}} = 0.5$  mL,  $T = 100$  °C (13.5 h),  $[\text{styrene}]_0 : [\text{ECIB}]_0 : [\text{CuCl}_2/\text{TPMA}]_0 : [\text{H}_2\text{AA}]_0 : [\text{DIPEA}]_0 = 100 : 1.04 : 0.025 : 0.125 : 0.25$ .

**Fig. S6 – MWD of entry 13 of Table 1**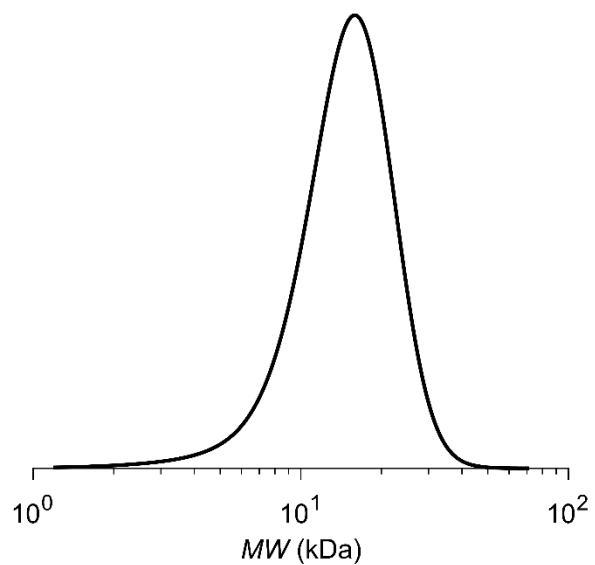**Fig. S6 – MWD of entry 13 of Table 1.** Conditions:  $V_{\text{styrene}} = 12$  mL,  $V_{\text{EtOAc}} = 3.5$  mL,  $V_{\text{EtOH}} = 0.5$  mL,  $T = 100$  °C (24 h),  $[\text{styrene}]_0 : [\text{ECIB}]_0 : [\text{CuCl}_2/\text{TPMA}]_0 : [\text{H}_2\text{AAIPi}]_0 : [\text{DIPEA}]_0 = 100 : 0.52 : 0.0125 : 0.125 : 0.25$ .

**Fig. S7 –  $^1\text{H-NMR}$  of entry 12 of Table 1.**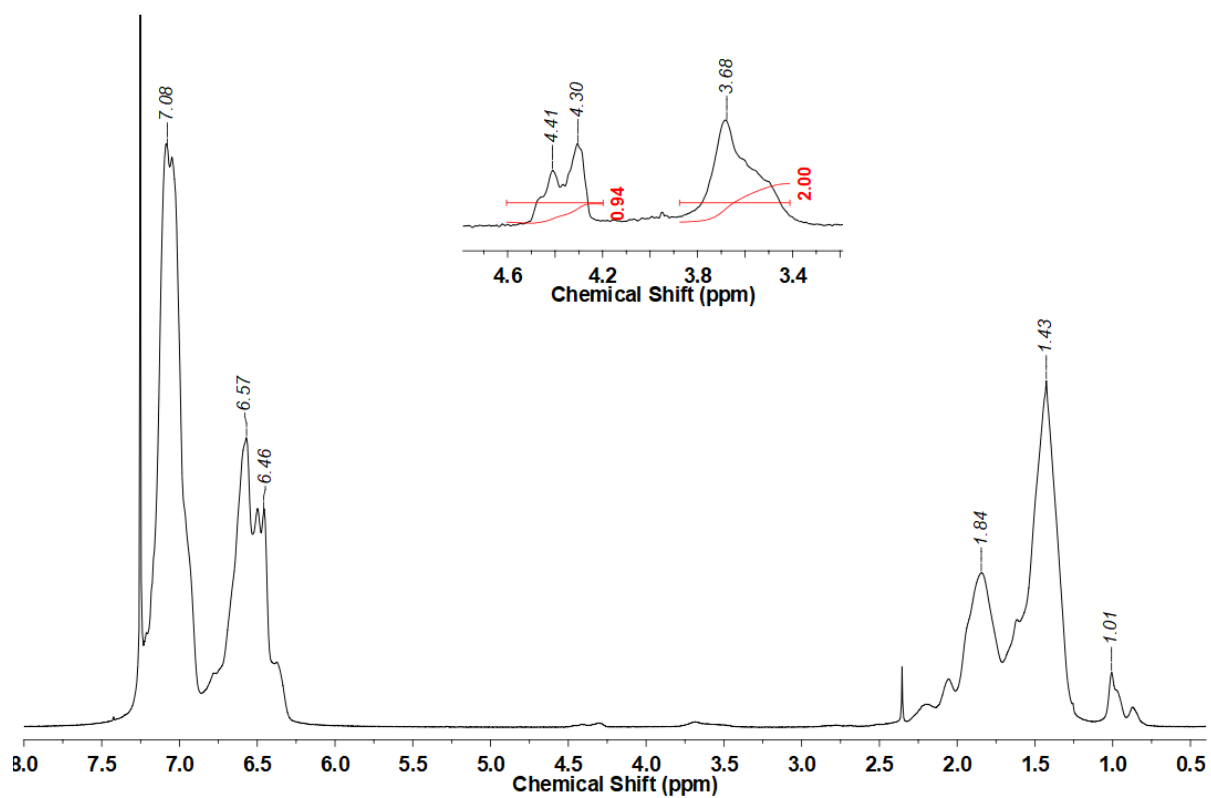

**Fig. S7 –  $^1\text{H-NMR}$  of entry 12 of Table 1.** Conditions:  $V_{\text{styrene}} = 6 \text{ mL}$ ,  $V_{\text{EtOAc}} = 3.5 \text{ mL}$ ,  $V_{\text{EtOH}} = 0.5 \text{ mL}$ ,  $T = 100 \text{ }^\circ\text{C}$  (13.5 h),  $[\text{styrene}]_0 : [\text{ECiB}]_0 : [\text{CuCl}_2/\text{TPMA}]_0 : [\text{H}_2\text{AA}]_0 : [\text{DIPEA}]_0 = 100 : 1.04 : 0.025 : 0.125 : 0.25$ .

**Fig. S8 –  $^1\text{H-NMR}$  of Entry 16 of Table 1**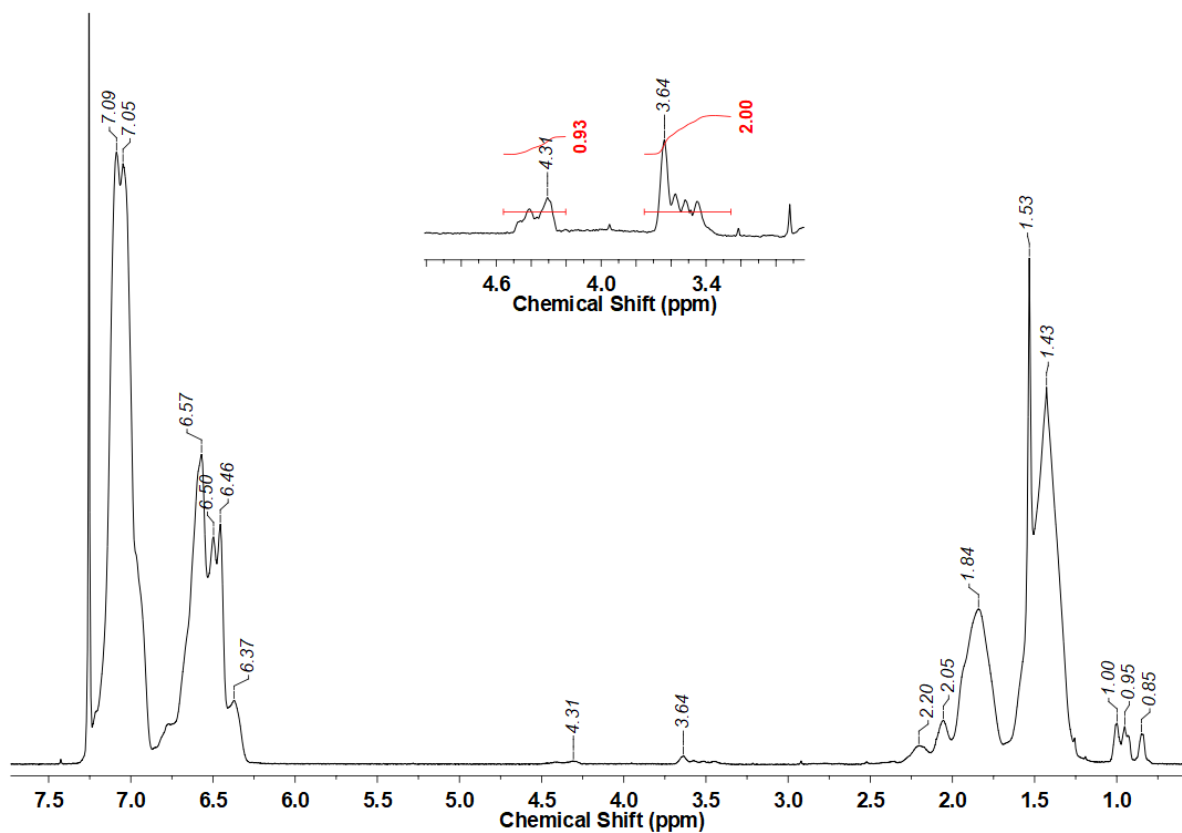

**Fig. S8 –  $^1\text{H-NMR}$  of the reaction conditions:  $V_{\text{St}} = 6 \text{ mL}$ ,  $V_{\text{EtOAc}} = 3.5 \text{ mL}$ ,  $V_{\text{EtOH}} = 0.5 \text{ mL}$ ,  $T = 100 \text{ }^\circ\text{C}$  (24 h),  $[\text{Styrene}]_0 : [\text{ECiB}]_0 : [\text{CuCl}_2/\text{TPMA}]_0 : [\text{H}_2\text{AAIPi}]_0 : [\text{TMP}]_0 = 100 : 1.04 : 0.025 : 0.25 : 1.5$ .**

**Table S2 – Full Factorial Design of TMP-promoted ARGET ATRP of styrene with H<sub>2</sub>AAIPI****Table S2** – Full factorial design of TMP-promoted ARGET ATRP of styrene with H<sub>2</sub>AAIPI

| entry           | [CuCl <sub>2</sub> /TPMA] <sub>0</sub><br>(mol%) | [benzalchloride] <sub>0</sub><br>(mol%) | [H <sub>2</sub> AAIPI] <sub>0</sub> /[TMP] <sub>0</sub><br>(mol%/mol%) | Time<br>(h) | Conv<br>(%) | M <sub>n</sub><br>(kDa) | ΔM <sub>n</sub><br>(%) | Đ    |
|-----------------|--------------------------------------------------|-----------------------------------------|------------------------------------------------------------------------|-------------|-------------|-------------------------|------------------------|------|
| 1               | 0.0625                                           | 1                                       | 0.125/0.750                                                            | 20          | 50.9        | 5.25                    | -4.43                  | 1.33 |
| 2 <sup>B</sup>  | 0.0625                                           | 1                                       | 0.250/1.50                                                             | 25          | 59.3        | 6.41                    | +0.14                  | 1.32 |
| 3               | 0.250                                            | 1                                       | 0.250/1.50                                                             | 20          | 53.6        | 6.00                    | +3.92                  | 1.15 |
| 4               | 0.250                                            | 1                                       | 0.125/0.750                                                            | 25          | 53.1        | 5.32                    | -7.38                  | 1.15 |
| 5               | 0.0625                                           | 2                                       | 0.250/1.50                                                             | 20          | 51.9        | 3.26                    | +11.8                  | 1.32 |
| 6               | 0.0625                                           | 2                                       | 0.125/0.750                                                            | 25          | 50.5        | 3.32                    | +15.6                  | 1.30 |
| 7 <sup>B</sup>  | 0.250                                            | 2                                       | 0.125/0.750                                                            | 20          | 39.8        | 2.40                    | +6.68                  | 1.14 |
| 8               | 0.250                                            | 2                                       | 0.250/1.50                                                             | 25          | 54.0        | 2.88                    | -3.60                  | 1.14 |
| 9 <sup>B</sup>  | 0.250                                            | 1                                       | 0.250/1.50                                                             | 25          | 57.6        | 5.02                    | -23.2                  | 1.17 |
| 10              | 0.250                                            | 2                                       | 0.250/1.50                                                             | 20          | 48.5        | 2.58                    | -4.51                  | 1.16 |
| 11              | 0.250                                            | 2                                       | 0.125/0.750                                                            | 25          | 46.2        | 2.48                    | -3.87                  | 1.16 |
| 12              | 0.0625                                           | 1                                       | 0.125/0.750                                                            | 25          | 51.0        | 4.75                    | -15.6                  | 1.35 |
| 13              | 0.250                                            | 1                                       | 0.125/0.750                                                            | 20          | 46.3        | 4.05                    | -23.5                  | 1.18 |
| 14 <sup>B</sup> | 0.0625                                           | 2                                       | 0.250/1.50                                                             | 25          | 54.3        | 3.49                    | +14.1                  | 1.32 |
| 15              | 0.0625                                           | 2                                       | 0.125/0.750                                                            | 20          | 38.0        | 2.90                    | +26.0                  | 1.33 |
| 16              | 0.0625                                           | 1                                       | 0.250/1.50                                                             | 20          | 51.3        | 4.85                    | -13.9                  | 1.35 |
| 17              | 0.156                                            | 1.5                                     | 0.188/1.13                                                             | 22.5        | 50.5        | 3.27                    | -12.5                  | 1.21 |
| 18              | 0.156                                            | 1.5                                     | 0.188/1.13                                                             | 22.5        | 52.2        | 3.71                    | -2.40                  | 1.20 |

<sup>A</sup> Common reaction conditions: V<sub>styrene</sub> : V<sub>EtOAc</sub> : V<sub>EtOH</sub> = 6 : 3.5 : 0.5 mL, T = 100 °C. <sup>B</sup> The reaction has been conducted twice and the mean values are reported.
